# Supplementary material for: Magnetic-field enhanced interfacial electron redistribution to promote magnetoelectrocatalytic hydrogen evolution
Source: Royal Society of Chemistry journal article supplement (doi:10.1039/d4qi02993c), 2025-01-01
Supplement: d4qi02993c1.pdf [file d4qi02993c1.pdf]

# Magnetic Field Enhances Interfacial Electron Redistribution to Promote Magneto-electrocatalytic Hydrogen Evolution

Chong Liu<sup>1</sup>, Lianqing Yu\*<sup>1</sup>, Nannan Chen<sup>1</sup>, Gege Tian<sup>2</sup>, Haifeng Zhu\*<sup>2</sup>

1. School of Materials Science and Engineering, China University of Petroleum, Qingdao 266580  
China.

2. College of Science, China University of Petroleum, Qingdao 266580 China.

\*Corresponding author Lianqing Yu *Email: [iyy2000@163.com](mailto:iyy2000@163.com)*

Haifeng Zhu *Email: [zhufeng\\_97@upc.edu.cn](mailto:zhufeng_97@upc.edu.cn)*

## Supplementary Methods

### Chemicals and materials

Ammonium molybdate tetrahydrate ((NH<sub>4</sub>)<sub>6</sub>Mo<sub>7</sub>O<sub>24</sub>·4H<sub>2</sub>O), ferric chloride hexahydrate (FeCl<sub>3</sub>·6H<sub>2</sub>O), Cetyltrimethylammonium bromide (CTAB), melamine (C<sub>3</sub>H<sub>6</sub>N<sub>6</sub>), potassium hydroxide (KOH), and ethanol (C<sub>2</sub>H<sub>5</sub>OH) were purchased from Aladdin company, (Shanghai, China). The above chemicals were used as received.

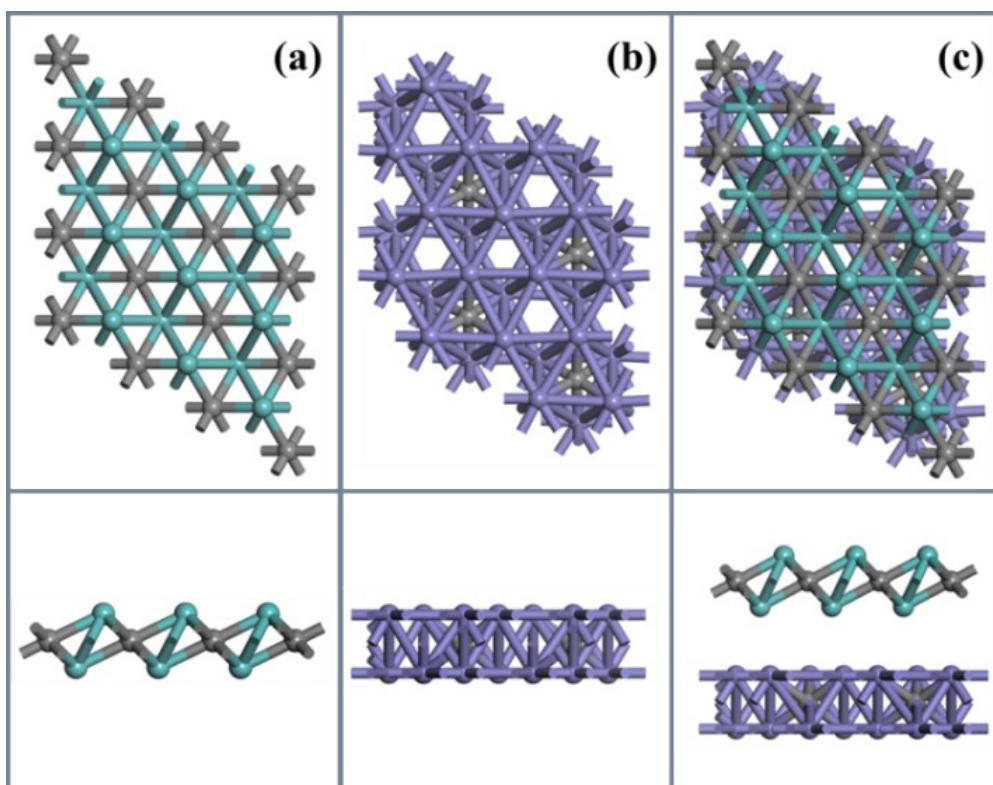

**Fig. S1** Top and side views of the Mo<sub>2</sub>C (a), Fe<sub>3</sub>C (b), and Mo<sub>2</sub>C/Fe<sub>3</sub>C (c).

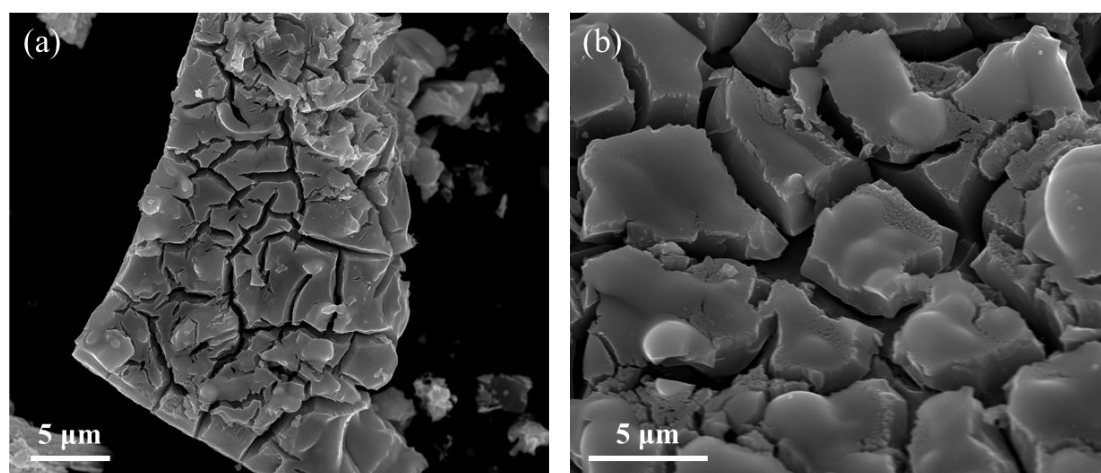

**Fig. S2** SEM images of Mo<sub>2</sub>C.

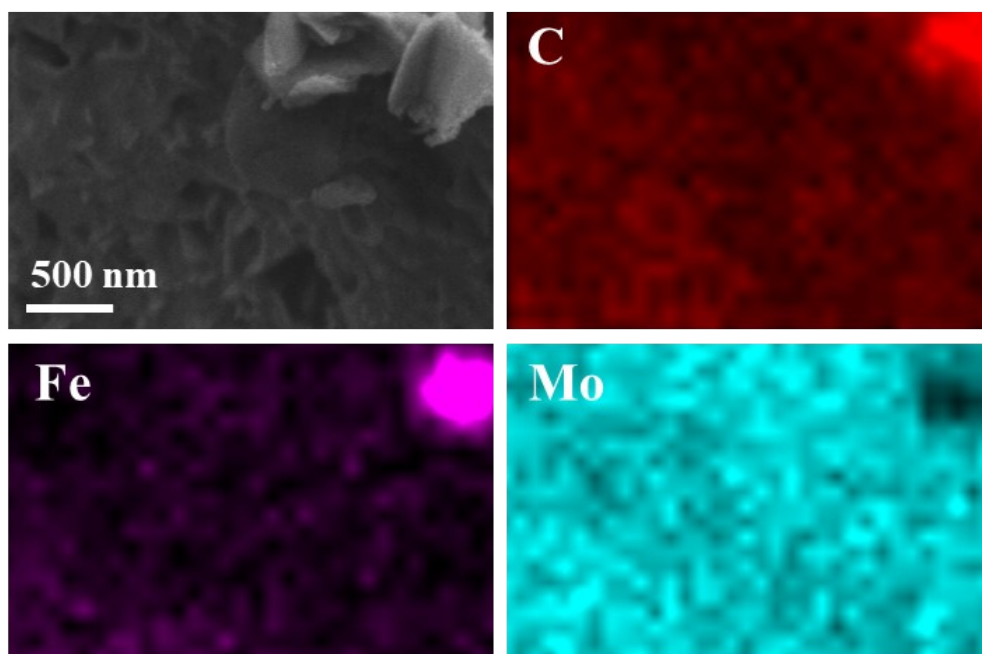

**Fig. S3** SEM images of  $\text{Mo}_2\text{C}/\text{Fe}_3\text{C}$ -1:1 and corresponding element mappings.

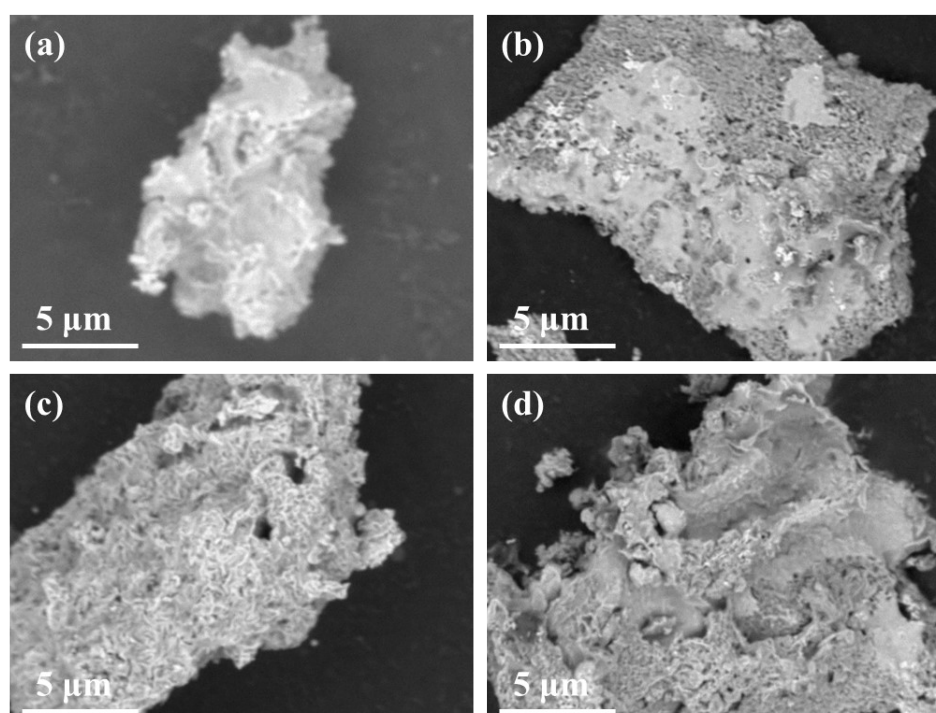

**Fig. S4** SEM images of  $\text{Mo}_2\text{C}/\text{Fe}_3\text{C}$ -2:1 (a-b) and  $\text{Mo}_2\text{C}/\text{Fe}_3\text{C}$ -1:2 (c-d).

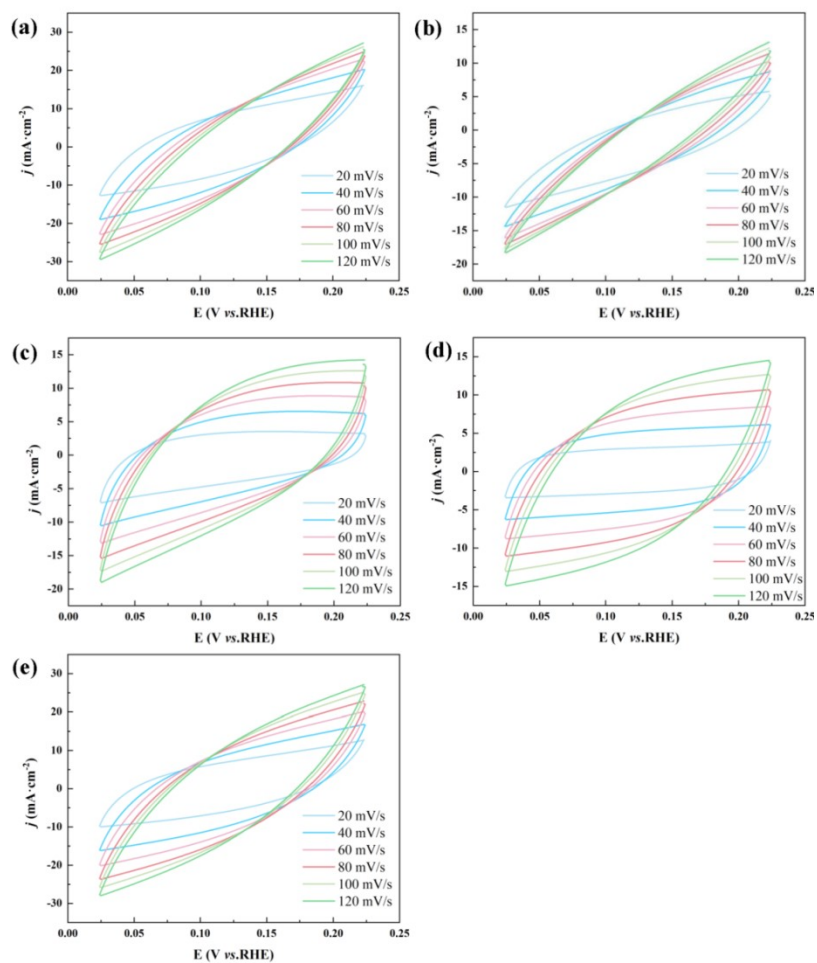

**Fig. S5** Cyclic voltammetry curves of  $\text{Mo}_2\text{C}$  (a),  $\text{Fe}_3\text{C}$  (b),  $\text{Mo}_2\text{C}/\text{Fe}_3\text{C}$ -2:1 (c),  $\text{Mo}_2\text{C}/\text{Fe}_3\text{C}$ -1:1 (d), and  $\text{Mo}_2\text{C}/\text{Fe}_3\text{C}$ -1:2 (e) at different scanning rates.

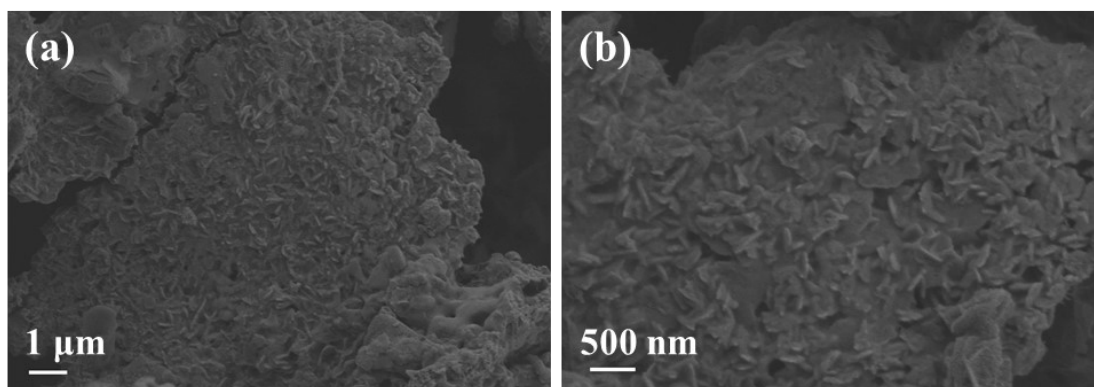

**Fig. S6** (a-b) SEM images of  $\text{Mo}_2\text{C}/\text{Fe}_3\text{C}$ -1:1 after the stability test.

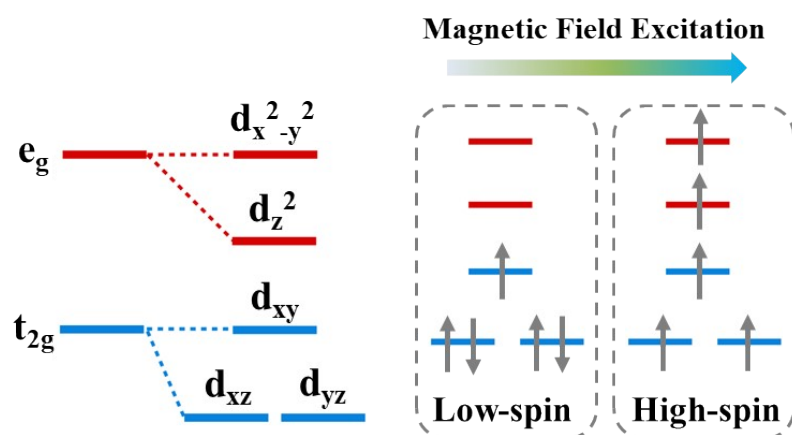

**Fig. S7** Electron transition of Fe from the low to high spin.

**Table S1** Values of resistance ( $R_s$ ), and charge transfer resistance ( $R_{ct}$ ) obtained after fitting the Nyquist plots determined on different samples.

| Electrocatalysts                        | $R_s$ ( $\Omega$ ) | $R_{ct}$ ( $\Omega$ ) |
|-----------------------------------------|--------------------|-----------------------|
| Mo <sub>2</sub> C                       | 1.16               | 11.92                 |
| Fe <sub>3</sub> C                       | 1.27               | 76.12                 |
| Mo <sub>2</sub> C/Fe <sub>3</sub> C-1:2 | 1.08               | 4.69                  |
| Mo <sub>2</sub> C/Fe <sub>3</sub> C-1:1 | 1.56               | 1.25                  |
| Mo <sub>2</sub> C/Fe <sub>3</sub> C-2:1 | 1.14               | 3.28                  |
